# Supplementary material for: Human brain representations of internally generated outcomes of approximate calculation revealed by ultra-high-field brain imaging
Source: PubMed Central journal article supplement (PMC10794709; doi:10.1038/s41467-024-44810-5), 2024-01-17
Supplement: 41467_2024_44810_MOESM3_ESM.pdf [file 41467_2024_44810_MOESM3_ESM.pdf]

## Reporting Summary

Nature Portfolio wishes to improve the reproducibility of the work that we publish. This form provides structure for consistency and transparency in reporting. For further information on Nature Portfolio policies, see our [Editorial Policies](#) and the [Editorial Policy Checklist](#).

### Statistics

For all statistical analyses, confirm that the following items are present in the figure legend, table legend, main text, or Methods section.

n/a Confirmed

- The exact sample size ( $n$ ) for each experimental group/condition, given as a discrete number and unit of measurement
- A statement on whether measurements were taken from distinct samples or whether the same sample was measured repeatedly
- The statistical test(s) used AND whether they are one- or two-sided  
*Only common tests should be described solely by name; describe more complex techniques in the Methods section.*
- A description of all covariates tested
- A description of any assumptions or corrections, such as tests of normality and adjustment for multiple comparisons
- A full description of the statistical parameters including central tendency (e.g. means) or other basic estimates (e.g. regression coefficient) AND variation (e.g. standard deviation) or associated estimates of uncertainty (e.g. confidence intervals)
- For null hypothesis testing, the test statistic (e.g.  $F$ ,  $t$ ,  $r$ ) with confidence intervals, effect sizes, degrees of freedom and  $P$  value noted  
*Give  $P$  values as exact values whenever suitable.*
- For Bayesian analysis, information on the choice of priors and Markov chain Monte Carlo settings
- For hierarchical and complex designs, identification of the appropriate level for tests and full reporting of outcomes
- Estimates of effect sizes (e.g. Cohen's  $d$ , Pearson's  $r$ ), indicating how they were calculated

*Our web collection on [statistics for biologists](#) contains articles on many of the points above.*

### Software and code

Policy information about [availability of computer code](#)

Data collection

Data analysis

For manuscripts utilizing custom algorithms or software that are central to the research but not yet described in published literature, software must be made available to editors and reviewers. We strongly encourage code deposition in a community repository (e.g. GitHub). See the Nature Portfolio [guidelines for submitting code & software](#) for further information.

### Data

Policy information about [availability of data](#)

All manuscripts must include a [data availability statement](#). This statement should provide the following information, where applicable:

- Accession codes, unique identifiers, or web links for publicly available datasets
- A description of any restrictions on data availability
- For clinical datasets or third party data, please ensure that the statement adheres to our [policy](#)

The functional imaging data (individual subjects' first-level fMRI models, anatomical images, and ROI images) generated as part of this study have been deposited in an Open Science Framework database (<https://osf.io/2tnrz/>). Source data plotted in the figures are provided with this paper.

## Research involving human participants, their data, or biological material

Policy information about studies with [human participants or human data](#). See also policy information about [sex, gender \(identity/presentation\), and sexual orientation](#) and [race, ethnicity and racism](#).

|                                                                    |                                                                                                                                                                                                                                                                                                                                                                                                                                                                                                                                                                                                                                                                                                                                                                                                                                                                                                                                       |
|--------------------------------------------------------------------|---------------------------------------------------------------------------------------------------------------------------------------------------------------------------------------------------------------------------------------------------------------------------------------------------------------------------------------------------------------------------------------------------------------------------------------------------------------------------------------------------------------------------------------------------------------------------------------------------------------------------------------------------------------------------------------------------------------------------------------------------------------------------------------------------------------------------------------------------------------------------------------------------------------------------------------|
| Reporting on sex and gender                                        | Participants of both female and male sex (according to self report) were included in the study. No additional information on gender was collected. Sex and/or gender was not considered as a factor of interest in the design of the study, as this study was interested in brain correlates of numerical processing in as far as they apply to normal adult human subjects in general. As a consequence, the analyses reported in the paper concern the combined group of all subjects (which was roughly balanced for males and females). Separate analyses as a function of sex were not performed, since the resulting sample sizes of the individual groups are judged to be not large enough.                                                                                                                                                                                                                                   |
| Reporting on race, ethnicity, or other socially relevant groupings | The constructs of race/ethnicity or other socially relevant grouping were not considered in our study design, nor was any information related to them collected. These factors are not considered relevant for the questions related to cognition and brain function which are in the focus of this work.                                                                                                                                                                                                                                                                                                                                                                                                                                                                                                                                                                                                                             |
| Population characteristics                                         | The collected sample included healthy adults aged 25.9 +/- 6.9 years old.                                                                                                                                                                                                                                                                                                                                                                                                                                                                                                                                                                                                                                                                                                                                                                                                                                                             |
| Recruitment                                                        | Subjects were recruited by para-medical staff of the host institution. More specifically, the neuroimaging research done at Neurospin is regularly advertised in surrounding universities and other public institutions. Persons interested in participating can then contact the para-medical staff who perform a first check to exclude contra-indications for participation in MRI research, after which they are included in a local volunteer database, and can inscribe themselves for proposed slots of ongoing experiments. Since the decision to participate is left up to the individual, self selection bias is likely present (yielding participants with a higher degree of interest in the topic of the study or brain function more generally). These motivational factors are, however, unlikely to affect brain activity differences in response to the stimuli presented, and thus the pattern of results obtained. |
| Ethics oversight                                                   | Comité de protection des personnes [CPP] Ile de France VII, Hôpital de Bicêtre                                                                                                                                                                                                                                                                                                                                                                                                                                                                                                                                                                                                                                                                                                                                                                                                                                                        |

Note that full information on the approval of the study protocol must also be provided in the manuscript.

## Field-specific reporting

Please select the one below that is the best fit for your research. If you are not sure, read the appropriate sections before making your selection.

Life sciences  Behavioural & social sciences  Ecological, evolutionary & environmental sciences

For a reference copy of the document with all sections, see [nature.com/documents/nr-reporting-summary-flat.pdf](https://nature.com/documents/nr-reporting-summary-flat.pdf)

## Behavioural & social sciences study design

All studies must disclose on these points even when the disclosure is negative.

|                   |                                                                                                                                                                                                                                                                                                                                                                                                                                                                 |
|-------------------|-----------------------------------------------------------------------------------------------------------------------------------------------------------------------------------------------------------------------------------------------------------------------------------------------------------------------------------------------------------------------------------------------------------------------------------------------------------------|
| Study description | quantitative cross-sectional (fMRI group study)                                                                                                                                                                                                                                                                                                                                                                                                                 |
| Research sample   | We acquired fMRI data in 18 subjects (9 male and 9 female, 25.9 +/- 6.9 years old), with normal visual acuity, free of neurological or psychiatric disease, and without a history of learning disability, representative of well-educated young adults from the greater Paris area. The rationale for selecting a sample of healthy, neurotypical participants is that we are interested in the study or normal brain function.                                 |
| Sampling strategy | The group represents a convenience sample of healthy young adults inscribed in the volunteer database of the host institution, who could sign up for the proposed experimental slots on the internet. No a priori sample size calculation was performed, but the sample size was chosen to be comparable to previous studies of our group in the domain of interest at the same MRI field strength (e.g., Castaldi et al., 2019, Elife, Castaldi et al., 2020). |
| Data collection   | Data were collected on a SIEMENS Magnetom 7 T scanner. A radiographer was present in addition to the researcher in the console room while the participant was in the scanner. Researchers were not blinded (which is irrelevant since experimental conditions were manipulated within subject and their presentation controlled by stimulus delivery software in an automatized fashion).                                                                       |
| Timing            | Data were collected between 01/04/2019 and 01/08/2019.                                                                                                                                                                                                                                                                                                                                                                                                          |
| Data exclusions   | Data of one participant were excluded from analysis after failing to properly understand task instructions and pressing response buttons erratically while in the scanner.                                                                                                                                                                                                                                                                                      |
| Non-participation | No participant dropped out / declined participation.                                                                                                                                                                                                                                                                                                                                                                                                            |
| Randomization     | Participants were allocated to a single group. Experimental conditions were presented in randomized order within each scanning session (randomized separately for each participant).                                                                                                                                                                                                                                                                            |

# Reporting for specific materials, systems and methods

We require information from authors about some types of materials, experimental systems and methods used in many studies. Here, indicate whether each material, system or method listed is relevant to your study. If you are not sure if a list item applies to your research, read the appropriate section before selecting a response.

## Materials & experimental systems

- n/a  Involved in the study
- Antibodies
- Eukaryotic cell lines
- Palaeontology and archaeology
- Animals and other organisms
- Clinical data
- Dual use research of concern
- Plants

## Methods

- n/a  Involved in the study
- ChIP-seq
- Flow cytometry
- MRI-based neuroimaging

## Plants

- Seed stocks
- Novel plant genotypes
- Authentication

## Magnetic resonance imaging

### Experimental design

- Design type
- Design specifications
- Behavioral performance measures

### Acquisition

- Imaging type(s)
- Field strength
- Sequence & imaging parameters
- Area of acquisition
- Diffusion MRI  Used  Not used

### Preprocessing

- Preprocessing software

|                            |                                                        |
|----------------------------|--------------------------------------------------------|
| Normalization              | Non-linear normalization in surface space (FreeSurfer) |
| Normalization template     | Fsaverage                                              |
| Noise and artifact removal | motion parameters as covariates of no interest in GLM  |
| Volume censoring           | None                                                   |

### Statistical modeling & inference

|                                           |                                                                                                                                                                                                                                               |
|-------------------------------------------|-----------------------------------------------------------------------------------------------------------------------------------------------------------------------------------------------------------------------------------------------|
| Model type and settings                   | First-level fixed-effects model within subjects, RSA analysis within subject, second-level random-effects group statistics                                                                                                                    |
| Effect(s) tested                          | RSA analysis: effects of predictors corresponding to pairwise differences in sample number, operation, operand, and result number across the 10 experimental conditions, regressed onto fMRI pattern distance matrices in multiple regression |
| Specify type of analysis:                 | <input type="checkbox"/> Whole brain <input type="checkbox"/> ROI-based <input checked="" type="checkbox"/> Both                                                                                                                              |
| Anatomical location(s)                    | HCP-MMP1 atlas                                                                                                                                                                                                                                |
| Statistic type for inference              | cluster-wise inference (pFWE < .05, with cluster forming threshold $p < .01$ )                                                                                                                                                                |
| (See <a href="#">Eklund et al. 2016</a> ) |                                                                                                                                                                                                                                               |
| Correction                                | FWE correction by permutation in whole brain analyses, FDR correction in ROI analysis                                                                                                                                                         |

### Models & analysis

|                                               |                                                                                                                                                                                                                                                                                        |
|-----------------------------------------------|----------------------------------------------------------------------------------------------------------------------------------------------------------------------------------------------------------------------------------------------------------------------------------------|
| n/a                                           | Involvement in the study                                                                                                                                                                                                                                                               |
| <input checked="" type="checkbox"/>           | <input type="checkbox"/> Functional and/or effective connectivity                                                                                                                                                                                                                      |
| <input checked="" type="checkbox"/>           | <input type="checkbox"/> Graph analysis                                                                                                                                                                                                                                                |
| <input type="checkbox"/>                      | <input checked="" type="checkbox"/> Multivariate modeling or predictive analysis                                                                                                                                                                                                       |
| Multivariate modeling and predictive analysis | Multivariate decoding by linear support vector regression ( $C=1$ ), applied to patterns extracted from ROIs without further feature selection, cross-validation with leave-one-session-out, evaluation of performance by Pearson correlation score between real and predicted labels. |
